# Supplementary material for: Investigating Candida glabrata Urinary Tract Infections (UTIs) in Mice Using Bioluminescence Imaging
Source: MDPI journal article supplement (doi:10.3390/jof7100844), 2021-10-09
Supplement: s1 [file s1]

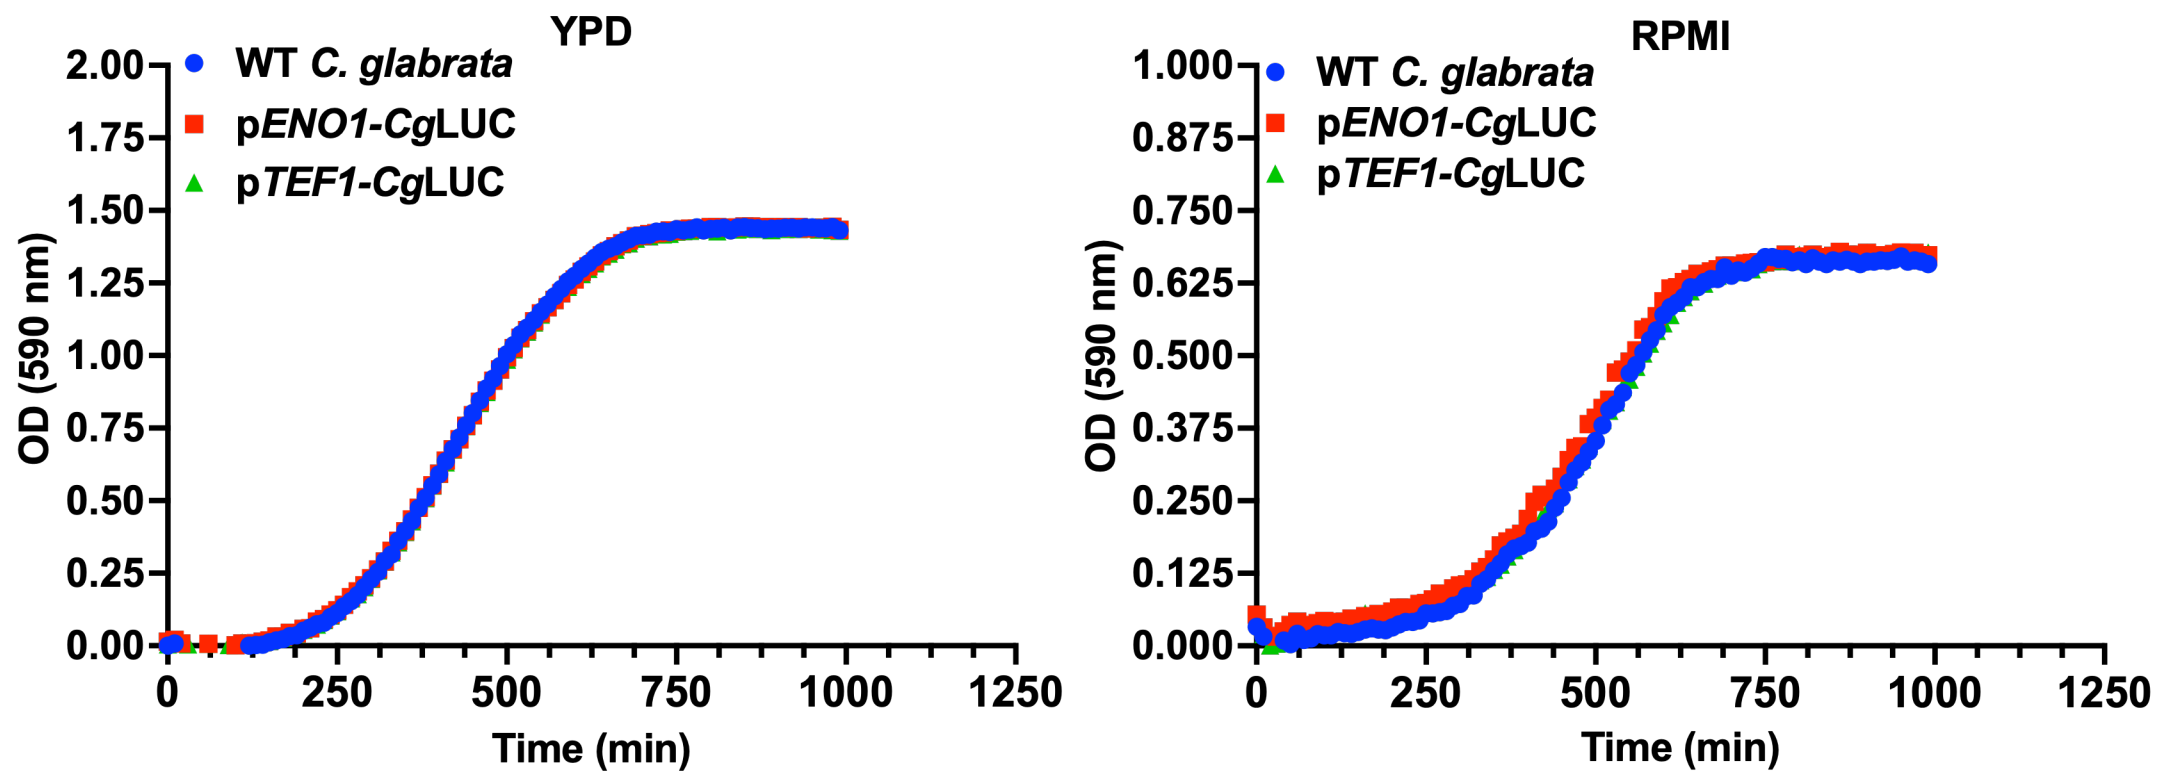

**Figure S1:** Luminescent *C. glabrata* strains have a similar growth rate compared to the wild type strain in YPD and RPMI (0.2% glucose).
